# Supplementary material for: Olfactory coding from the periphery to higher brain centers in the Drosophila brain
Source: PubMed Central journal article supplement (PMC5493115; doi:10.1186/s12915-017-0389-z), 2017-06-30

# Supplementary Figure 9

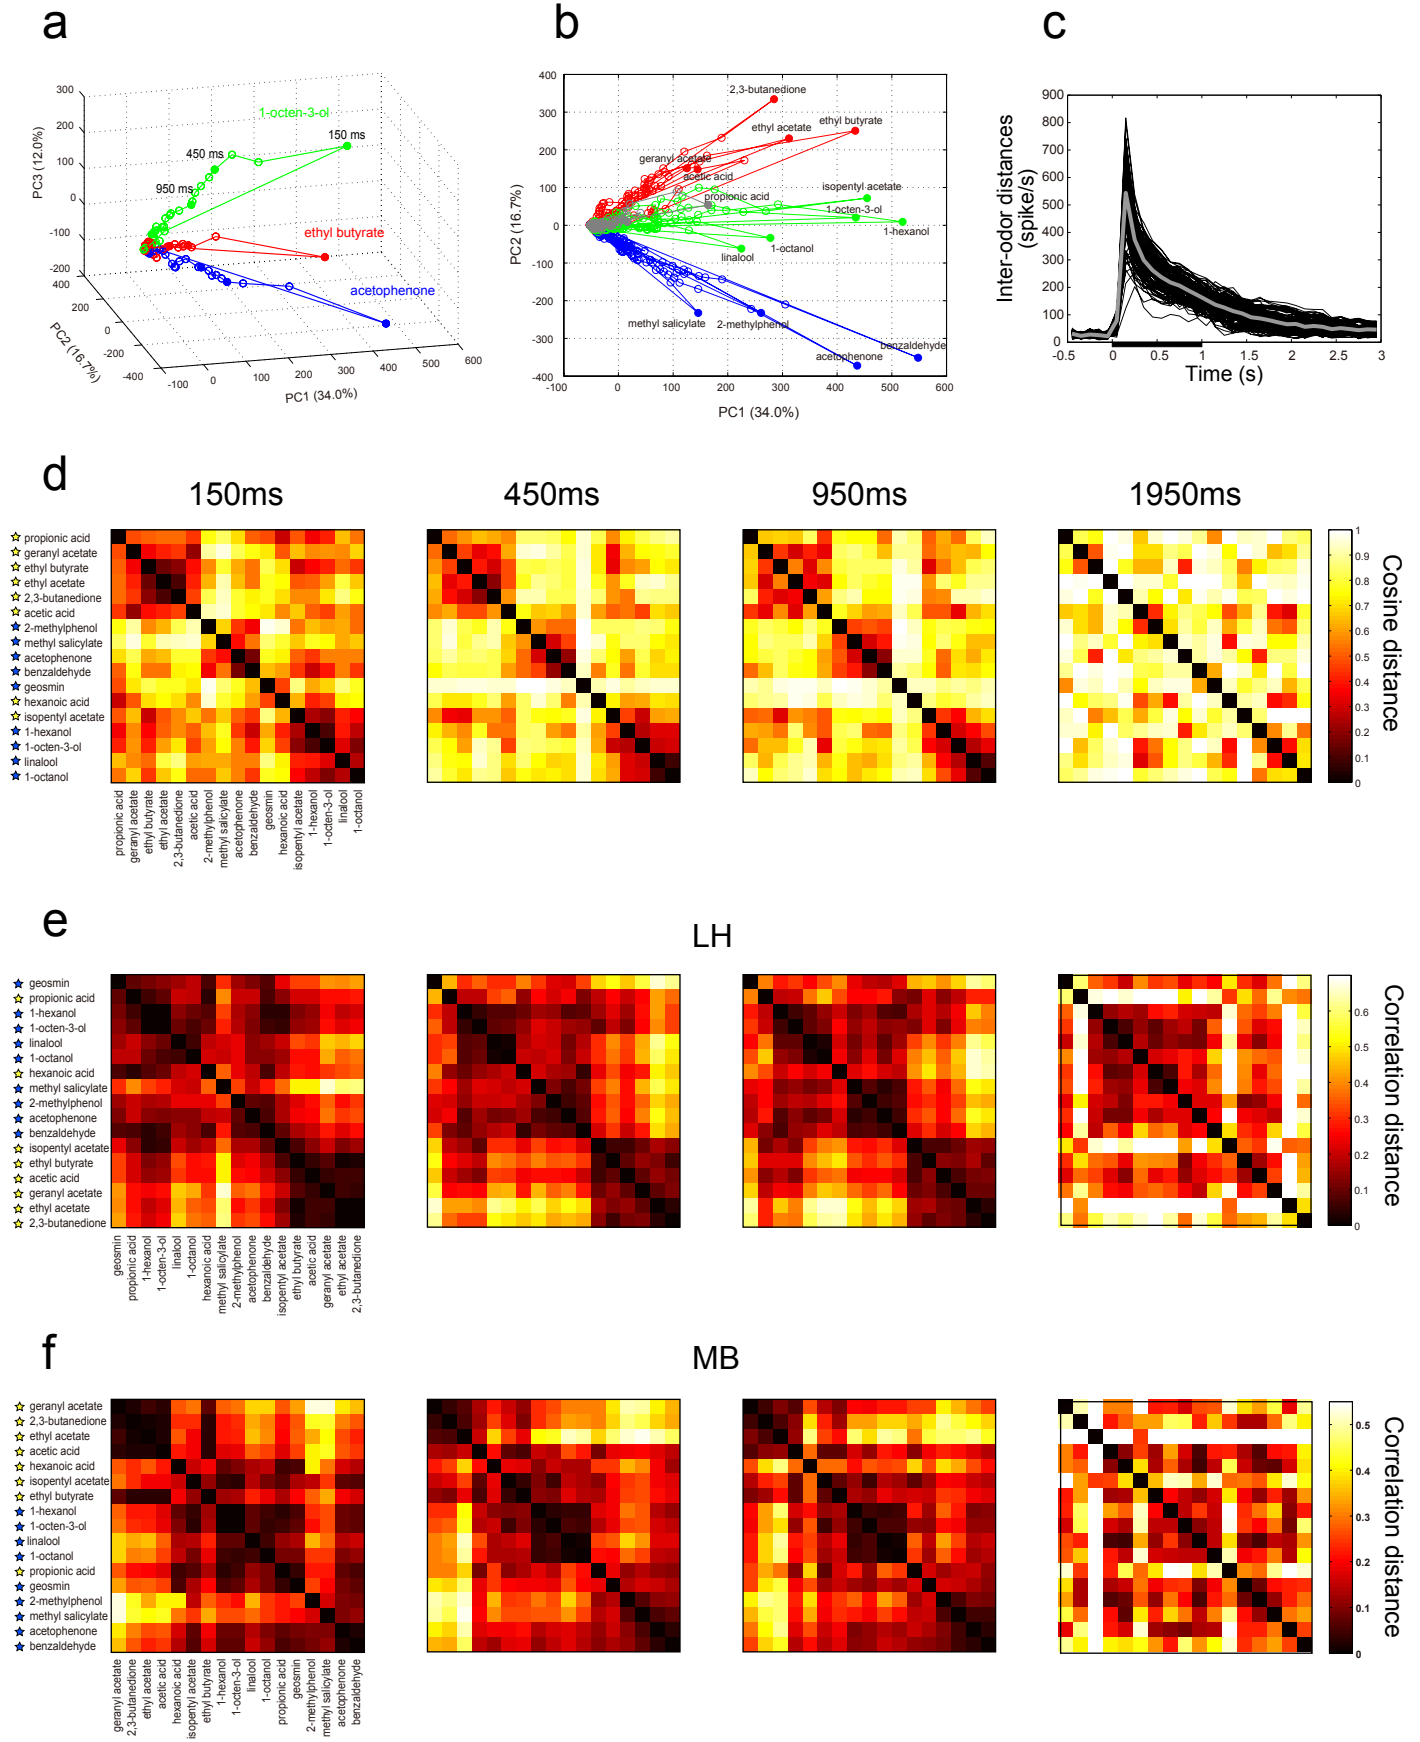

Supplement: 12915_2017_389_MOESM12_ESM.pdf [file 12915_2017_389_MOESM12_ESM.pdf]
